# Supplementary material for: Genomic Correlates of Unfavorable Outcome in Locally Advanced Cervical Cancer Treated with Neoadjuvant Chemoradiation
Source: PubMed Central journal article supplement — Cancer Res Treat. 2022 Jan 17;54(4):1209–18. doi: 10.4143/crt.2021.963 (PMC9582489; doi:10.4143/crt.2021.963), 2022-01-17
Supplement: crt-2021-963_S1-Table.pdf [file crt-2021-963_S1-Table.pdf]

**S1 Table.** Patients' demographic and clinical data

| Patient ID | Age | Stage <sup>a)</sup> | Histological type | HPV type | Microsatellite instability | Neoadjuvant chemotherapy                        | Pathologic response <sup>b)</sup> | Percent of residual viable tumor (%) | Adjuvant chemotherapy                              |
|------------|-----|---------------------|-------------------|----------|----------------------------|-------------------------------------------------|-----------------------------------|--------------------------------------|----------------------------------------------------|
| CC_086     | 47  | II A                | SQCC              | 16       | MSS                        | Paclitaxel plus carboplatin, one cycle          | Non-MPR                           | 20-30                                | Paclitaxel plus carboplatin, three cycles          |
| CC_061     | 43  | II A                | SQCC              | 16       | MSS                        | Paclitaxel liposome plus carboplatin, one cycle | Non-MPR                           | 20                                   | Paclitaxel liposome plus carboplatin, three cycles |
| CC_106     | 31  | I B                 | ADC               | 16       | MSS                        | Paclitaxel plus carboplatin, one cycle          | Non-MPR                           | > 90                                 | Paclitaxel plus carboplatin, three cycles          |
| CC_089     | 50  | II A                | SQCC              | Group A7 | MSS                        | Paclitaxel liposome plus carboplatin, one cycle | Non-MPR                           | 30                                   | Paclitaxel liposome plus carboplatin, three cycles |
| CC_087     | 48  | I B                 | SQCC              | n/a      | MSS                        | Paclitaxel plus carboplatin, one cycle          | Non-MPR                           | 90                                   | Paclitaxel plus carboplatin, three cycles          |
| CC_069     | 41  | I B                 | SQCC              | 18       | MSS                        | Paclitaxel plus nedaplatin, one cycle           | MPR                               | < 10                                 | Paclitaxel plus nedaplatin, three cycles           |
| CC_081     | 44  | I B                 | ADC               | 16       | <b>MSI</b>                 | Paclitaxel liposome plus carboplatin, one cycle | Non-MPR                           | > 80                                 | Paclitaxel liposome plus carboplatin, three cycles |
| CC_076     | 42  | II A                | SQCC              | n/a      | MSS                        | Paclitaxel plus cisplatin, one cycle            | Non-MPR                           | 50                                   | Paclitaxel plus cisplatin, three cycles            |
| CC_110     | 55  | I B                 | ADC               | n/a      | MSS                        | Paclitaxel plus cisplatin, one cycle            | Non-MPR                           | 70-80                                | Paclitaxel plus cisplatin, three cycles            |
| CC_083     | 44  | II A                | SQCC              | 16       | MSS                        | Paclitaxel plus nedaplatin, one cycle           | Non-MPR                           | 10-20                                | Paclitaxel plus nedaplatin, three cycles           |
| CC_101     | 56  | I B                 | SQCC              | 16       | <b>MSI</b>                 | Paclitaxel liposome plus nedaplatin, one cycle  | MPR                               | <10                                  | Paclitaxel liposome plus nedaplatin, three cycles  |
| CC_044     | 49  | II A                | SQCC              | 16       | MSS                        | Paclitaxel liposome plus nedaplatin, one cycle  | Non-MPR                           | 60-70                                | Paclitaxel liposome plus nedaplatin, three cycles  |
| CC_102     | 41  | I B                 | SQCC              | 16       | MSS                        | Paclitaxel liposome plus cisplatin, one cycle   | Non-MPR                           | 50                                   | Paclitaxel liposome plus cisplatin, three cycles   |
| CC_107     | 29  | II A                | ADC               | 16       | MSS                        | Paclitaxel plus carboplatin, one cycle          | Non-MPR                           | 50                                   | Paclitaxel plus carboplatin, three cycles          |
| CC_111     | 42  | I B                 | SQCC              | 16       | MSS                        | Paclitaxel liposome plus carboplatin, one cycle | Non-MPR                           | 50-60                                | Paclitaxel liposome plus carboplatin, three cycles |
| CC_104     | 35  | I B                 | SQCC              | 33       | MSS                        | Paclitaxel liposome plus cisplatin, one cycle   | Non-MPR                           | >90                                  | Paclitaxel liposome plus cisplatin, three cycles   |

|        |    |      |      |     |     |                                                      |         |       |                                                         |
|--------|----|------|------|-----|-----|------------------------------------------------------|---------|-------|---------------------------------------------------------|
| CC_067 | 45 | I B  | SQCC | 18  | MSS | Paclitaxel liposome plus nedaplatin, one cycle       | Non-MPR | 50-60 | Paclitaxel liposome plus nedaplatin, three cycles       |
| CC_084 | 48 | I B  | SQCC | n/a | MSS | Paclitaxel liposome plus carboplatin, one cycle      | Non-MPR | 80    | Paclitaxel liposome plus carboplatin, three cycles      |
| CC_096 | 53 | I B  | SQCC | 52  | MSS | Paclitaxel liposome plus carboplatin, one cycle      | Non-MPR | >90   | Paclitaxel liposome plus carboplatin, three cycles      |
| CC_066 | 43 | I B  | SQCC | 16  | MSS | Paclitaxel plus carboplatin, one cycle               | Non-MPR | 80    | Paclitaxel plus carboplatin, three cycles               |
| CC_100 | 47 | I B  | SQCC | 16  | MSS | Paclitaxel liposome plus carboplatin, one cycle      | Non-MPR | 90    | Paclitaxel liposome plus carboplatin, three cycles      |
| CC_048 | 33 | I B  | SQCC | n/a | MSS | Paclitaxel liposome plus nedaplatin, one cycle       | Non-MPR | 10-20 | Paclitaxel liposome plus nedaplatin, three cycles       |
| CC_060 | 46 | II A | SQCC | 16  | MSS | Paclitaxel plus nedaplatin, one cycle                | pCR     | 0     | Paclitaxel plus nedaplatin, three cycles                |
| CC_093 | 27 | II A | SQCC | 58  | MSS | Paclitaxel liposome plus carboplatin, one cycle      | MPR     | <10   | Paclitaxel liposome plus carboplatin, three cycles      |
| CC_047 | 53 | I B  | SQCC | 16  | MSS | Paclitaxel liposome plus carboplatin, one cycle      | Non-MPR | >90   | Paclitaxel liposome plus carboplatin, three cycles      |
| CC_059 | 46 | II A | SQCC | n/a | MSS | Paclitaxel plus nedaplatin, one cycle                | Non-MPR | 40-50 | Paclitaxel plus nedaplatin, three cycles                |
| CC_072 | 38 | I B  | ADC  | 31  | MSS | Paclitaxel liposome plus nedaplatin, one cycle       | Non-MPR | 20-30 | Paclitaxel liposome plus nedaplatin, three cycles       |
| CC_112 | 28 | I B  | SQCC | n/a | MSS | Paclitaxel plus carboplatin, one cycle               | Non-MPR | 40-50 | Paclitaxel plus carboplatin, three cycles               |
| CC_070 | 41 | II A | SQCC | 16  | MSS | Paclitaxel liposome plus cisplatin, one cycle        | Non-MPR | 70-80 | Paclitaxel liposome plus cisplatin, three cycles        |
| CC_045 | 36 | I B  | SQCC | n/a | MSS | Albumin bound paclitaxel plus carboplatin, one cycle | Non-MPR | 80    | Albumin bound paclitaxel plus carboplatin, three cycles |
| CC_071 | 26 | I B  | SQCC | 16  | MSS | Paclitaxel liposome plus nedaplatin, one cycle       | Non-MPR | 50    | Paclitaxel liposome plus nedaplatin, three cycles       |
| CC_094 | 58 | II A | SQCC | n/a | MSS | Paclitaxel liposome plus cisplatin, one cycle        | MPR     | <10   | Paclitaxel liposome plus cisplatin, three cycles        |

|        |    |      |      |     |            |                                                 |         |       |                                                    |
|--------|----|------|------|-----|------------|-------------------------------------------------|---------|-------|----------------------------------------------------|
| CC_079 | 41 | II A | SQCC | n/a | MSS        | Paclitaxel liposome plus lobaplatin, one cycle  | Non-MPR | 40-50 | Paclitaxel liposome plus lobaplatin, three cycles  |
| CC_010 | 49 | I B  | SQCC | 16  | MSS        | Paclitaxel plus carboplatin, one cycle          | MPR     | <10   | Paclitaxel plus carboplatin, three cycles          |
| CC_077 | 57 | II A | SQCC | n/a | MSS        | Paclitaxel liposome plus carboplatin, one cycle | Non-MPR | 50-60 | Paclitaxel liposome plus carboplatin, three cycles |
| CC_085 | 55 | II A | ADC  | 18  | MSS        | Paclitaxel liposome plus nedaplatin, one cycle  | Non-MPR | 10-20 | Paclitaxel liposome plus nedaplatin, three cycles  |
| CC_064 | 48 | I B  | ADC  | 16  | MSS        | Paclitaxel liposome plus carboplatin, one cycle | Non-MPR | >90   | Paclitaxel liposome plus carboplatin, three cycles |
| CC_024 | 56 | I B  | ADC  | n/a | MSS        | Docetaxel plus nedaplatin, one cycle            | MPR     | <10   | Docetaxel plus nedaplatin, three cycles            |
| CC_055 | 54 | II A | SQCC | 16  | MSS        | Paclitaxel liposome plus carboplatin, one cycle | Non-MPR | 20    | Paclitaxel liposome plus carboplatin, three cycles |
| CC_015 | 41 | I B  | SQCC | n/a | MSS        | Paclitaxel liposome plus nedaplatin, one cycle  | pCR     | 0     | Paclitaxel liposome plus nedaplatin, three cycles  |
| CC_020 | 54 | II A | ASC  | 16  | <b>MSI</b> | Paclitaxel plus carboplatin, one cycle          | Non-MPR | 20    | Paclitaxel plus carboplatin, three cycles          |
| CC_013 | 56 | II A | SQCC | 16  | MSS        | Paclitaxel liposome plus nedaplatin, one cycle  | MPR     | <10   | Paclitaxel liposome plus nedaplatin, three cycles  |
| CC_012 | 58 | II A | SQCC | 18  | MSS        | Paclitaxel plus carboplatin, one cycle          | Non-MPR | 20-30 | Paclitaxel plus carboplatin, three cycles          |
| CC_007 | 44 | II A | SQCC | 16  | MSS        | Paclitaxel plus nedaplatin, one cycle           | Non-MPR | 30-40 | Paclitaxel plus nedaplatin, three cycles           |
| CC_028 | 60 | I B  | SQCC | 58  | MSS        | Paclitaxel liposome plus carboplatin, one cycle | MPR     | <10   | Paclitaxel liposome plus carboplatin, three cycles |
| CC_034 | 66 | I B  | SQCC | 16  | MSS        | Paclitaxel liposome plus carboplatin, one cycle | MPR     | <10   | Paclitaxel liposome plus carboplatin, three cycles |
| CC_022 | 48 | II A | SQCC | n/a | MSS        | Docetaxel plus cisplatin, one cycle             | Non-MPR | 70-80 | Docetaxel plus cisplatin, three cycles             |
| CC_014 | 47 | I B  | SQCC | 16  | MSS        | Paclitaxel liposome plus carboplatin, one cycle | Non-MPR | <50   | Paclitaxel liposome plus carboplatin, three cycles |
| CC_030 | 37 | I B  | SQCC | 18  | MSS        | Paclitaxel liposome plus carboplatin, one cycle | Non-MPR | >50   | Paclitaxel liposome plus carboplatin, three cycles |

|        |    |      |      |     |     |                                                 |         |       |                                                    |
|--------|----|------|------|-----|-----|-------------------------------------------------|---------|-------|----------------------------------------------------|
| CC_018 | 55 | II A | SQCC | n/a | MSS | Paclitaxel liposome plus cisplatin, one cycle   | Non-MPR | >90   | Paclitaxel liposome plus cisplatin, three cycles   |
| CC_054 | 53 | I B  | SQCC | 16  | MSS | Docetaxel plus nedaplatin, one cycle            | MPR     | <10   | Docetaxel plus nedaplatin, three cycles            |
| CC_027 | 44 | I B  | SQCC | n/a | MSS | Paclitaxel liposome plus nedaplatin, one cycle  | Non-MPR | 20-30 | Paclitaxel liposome plus nedaplatin, three cycles  |
| CC_056 | 43 | II A | SQCC | 16  | MSS | Docetaxel plus nedaplatin, one cycle            | Non-MPR | 90    | Docetaxel plus nedaplatin, three cycles            |
| CC_019 | 36 | I B  | SQCC | n/a | MSS | Paclitaxel liposome plus carboplatin, one cycle | Non-MPR | 30-40 | Paclitaxel liposome plus carboplatin, three cycles |
| CC_025 | 41 | II A | ASC  | 16  | MSS | Paclitaxel plus carboplatin, one cycle          | MPR     | <10   | Paclitaxel plus carboplatin, three cycles          |
| CC_006 | 35 | II A | ADC  | 52  | MSS | Paclitaxel plus carboplatin, one cycle          | Non-MPR | 40-50 | Paclitaxel plus carboplatin, three cycles          |
| CC_037 | 51 | I B  | SQCC | 45  | MSS | Paclitaxel liposome plus nedaplatin, one cycle  | Non-MPR | 50-60 | Paclitaxel liposome plus nedaplatin, three cycles  |
| CC_008 | 50 | II A | SQCC | n/a | MSS | docetaxel plus cisplatin, one cycle             | Non-MPR | 50-60 | docetaxel plus cisplatin, three cycles             |
| CC_023 | 51 | I B  | SQCC | 16  | MSS | docetaxel plus nedaplatin, one cycle            | Non-MPR | 70-80 | docetaxel plus nedaplatin, three cycles            |
| CC_033 | 52 | II A | SQCC | 16  | MSS | Paclitaxel liposome plus nedaplatin, one cycle  | Non-MPR | 70-80 | Paclitaxel liposome plus nedaplatin, three cycles  |
| CC_036 | 59 | II A | SQCC | 18  | MSS | Docetaxel plus nedaplatin, one cycle            | Non-MPR | 70-80 | Docetaxel plus nedaplatin, three cycles            |
| CC_039 | 50 | I B  | SQCC | 16  | MSS | Paclitaxel liposome plus nedaplatin, one cycle  | Non-MPR | 70-80 | Paclitaxel liposome plus nedaplatin, three cycles  |

ADC, adenocarcinoma; ASC, adenosquamous carcinoma; MSI, microsatellite unstable; MSS, microsatellite stable; n/a, not available; SQCC, squamous carcinoma. <sup>a)</sup>The International Federation of Gynecology and Obstetrics (International Federation of Gynecology and Obstetrics) 2009, <sup>b)</sup>MPR, major pathologic response; pCR, complete pathologic response. The definition of MPR was initially described by Hellmann et al. (2014) [1].

## Reference

1. Hellmann MD, Chaft JE, William WN, Jr., Rusch V, Pisters KM, Kalhor N, et al. Pathological response after neoadjuvant chemotherapy in resectable non-small-cell lung cancers: proposal for the use of major pathological response as a surrogate endpoint. *Lancet Oncol.* 2014;15:e42-50.
