# Supplementary material for: Genomic Correlates of Unfavorable Outcome in Locally Advanced Cervical Cancer Treated with Neoadjuvant Chemoradiation
Source: PubMed Central journal article supplement — Cancer Res Treat. 2022 Jan 17;54(4):1209–18. doi: 10.4143/crt.2021.963 (PMC9582489; doi:10.4143/crt.2021.963), 2022-01-17
Supplement: crt-2021-963_S2-Table.pdf [file crt-2021-963_S2-Table.pdf]

**S2 Table.** The Geneseeq Radiotron panel that covers 474 cancer- and radiotherapy response-relevant genes

|         |
|---------|
| ADGRB3  |
| AFDN    |
| CCN6    |
| EMSY    |
| ERBIN   |
| MRE11   |
| PRKN    |
| SEPTIN9 |
| ABCB1   |
| ABCC2   |
| ABL1    |
| ADH1B   |
| AIP     |
| AKT1    |
| AKT2    |
| AKT3    |
| ALDH2   |
| ALK     |
| AMER1   |
| APC     |
| APEX1   |
| AR      |
| ARAF    |
| ARID1A  |
| ARID1B  |
| ARID2   |
| ARID5B  |
| ASCL4   |
| ASXL1   |
| ATF1    |
| ATIC    |
| ATM     |
| ATR     |
| ATRX    |
| AURKA   |
| AURKB   |
| AXIN2   |
| AXL     |
| B2M     |
| BAD     |

|         |
|---------|
| BAK1    |
| BAP1    |
| BARD1   |
| BAX     |
| BCL2    |
| BCL2L1  |
| BCL2L11 |
| BCL3    |
| BCR     |
| BIRC3   |
| BLM     |
| BMPR1A  |
| BRAF    |
| BRCA1   |
| BRCA2   |
| BRD4    |
| BRIP1   |
| BTG2    |
| BTK     |
| BUB1B   |
| CASP8   |
| CBL     |
| CBLB    |
| CCND1   |
| CCNE1   |
| CD274   |
| CD74    |
| CDA     |
| CDC73   |
| CDH1    |
| CDK10   |
| CDK12   |
| CDK4    |
| CDK6    |
| CDK8    |
| CDKN1A  |
| CDKN1B  |
| CDKN1C  |
| CDKN2A  |
| CDKN2B  |
| CDKN2C  |
| CEBPA   |
| CEP57   |

|         |
|---------|
| CHD4    |
| CHD8    |
| CHEK1   |
| CHEK2   |
| CREBBP  |
| CRKL    |
| CSF1R   |
| CTCF    |
| CTLA4   |
| CTNNB1  |
| CUL3    |
| CUX1    |
| CXCL8   |
| CXCR4   |
| CYLD    |
| CYP19A1 |
| CYP2A13 |
| CYP2A6  |
| CYP2A7  |
| CYP2B6  |
| CYP2C19 |
| CYP2C9  |
| CYP2D6  |
| CYP3A4  |
| CYP3A5  |
| CYSLTR2 |
| DAXX    |
| DDR2    |
| DENND1A |
| DHFR    |
| DICER1  |
| DLL3    |
| DNMT3A  |
| DOT1L   |
| DPYD    |
| DTL     |
| DUSP2   |
| EGFR    |
| EIF1AX  |
| EP300   |
| EPAS1   |
| EPCAM   |
| EPHA2   |

|        |
|--------|
| EPHA3  |
| EPHA5  |
| ERBB2  |
| ERBB3  |
| ERBB4  |
| ERCC1  |
| ERCC2  |
| ERCC3  |
| ERCC4  |
| ERCC5  |
| ESR1   |
| ETV1   |
| ETV4   |
| ETV5   |
| ETV6   |
| EWSR1  |
| EXT1   |
| EXT2   |
| EZH2   |
| EZR    |
| FANCA  |
| FANCC  |
| FANCD2 |
| FANCE  |
| FANCF  |
| FANCG  |
| FANCI  |
| FANCL  |
| FANCM  |
| FAT1   |
| FBXW7  |
| FGF19  |
| FGFR1  |
| FGFR2  |
| FGFR3  |
| FGFR4  |
| FH     |
| FLCN   |
| FLT1   |
| FLT3   |
| FLT4   |
| FOXA1  |
| FOXL2  |

|        |
|--------|
| FOXO3  |
| FOXP1  |
| FRG1   |
| GATA1  |
| GATA2  |
| GATA3  |
| GATA4  |
| GATA6  |
| GNA11  |
| GNAQ   |
| GNAS   |
| GRIN2A |
| GRM3   |
| GRM8   |
| GSTM1  |
| GSTM4  |
| GSTP1  |
| GSTT1  |
| HDAC1  |
| HDAC2  |
| HDAC9  |
| HGF    |
| HLA-A  |
| HMOX1  |
| HNF1A  |
| HNF1B  |
| HRAS   |
| HSPB1  |
| IDH1   |
| IDH2   |
| IFNA6  |
| IFNB1  |
| IFNE   |
| IFNG   |
| IFNGR1 |
| IFNGR2 |
| IGF1R  |
| IGF2   |
| IKBKE  |
| IKZF1  |
| IL13   |
| IL1A   |
| IL7R   |

|        |
|--------|
| INPP4B |
| IRF1   |
| IRF2   |
| ITGB6  |
| JAK1   |
| JAK2   |
| JAK3   |
| JARID2 |
| JUN    |
| KDM5A  |
| KDR    |
| KEAP1  |
| KIF1B  |
| KIT    |
| KITLG  |
| KLLN   |
| KMT2A  |
| KMT2B  |
| KMT2C  |
| KMT2D  |
| KRAS   |
| LHCGR  |
| LIG3   |
| LIG4   |
| LIN28B |
| LMO1   |
| LRP1B  |
| LYN    |
| LZTR1  |
| MALT1  |
| MAP2K1 |
| MAP2K2 |
| MAP2K4 |
| MAP3K1 |
| MAP3K4 |
| MAPK1  |
| MAPK3  |
| MAX    |
| MCL1   |
| MDM2   |
| MDM4   |
| MECOM  |
| MED12  |

|        |
|--------|
| MEF2B  |
| MEN1   |
| MET    |
| MGMT   |
| MIF    |
| MITF   |
| MLH1   |
| MLH3   |
| KMT2A  |
| KMT2D  |
| MMP1   |
| MPL    |
| MSH2   |
| MSH6   |
| MTHFR  |
| MTOR   |
| MTRR   |
| MUC5B  |
| MUTYH  |
| MYC    |
| MYCL   |
| MYCN   |
| MYD88  |
| MYH9   |
| NAT1   |
| NBN    |
| NCOR1  |
| NEIL1  |
| NF1    |
| NF2    |
| NFE2L2 |
| NFKB1  |
| NFKBIA |
| NKX2-1 |
| NOS2   |
| NOS3   |
| NOTCH1 |
| NOTCH2 |
| NOTCH3 |
| NPM1   |
| NQO1   |
| NRAS   |
| NRG1   |

|          |
|----------|
| NSD1     |
| NTHL1    |
| NTRK1    |
| NTRK2    |
| NTRK3    |
| NUTM1    |
| PAK2     |
| PAK3     |
| PALB2    |
| PALLD    |
| PARP1    |
| PARP2    |
| PAX5     |
| PBRM1    |
| PDCD1    |
| PDCD1LG2 |
| PDE11A   |
| PDGFRA   |
| PDGFRB   |
| PDK1     |
| PGR      |
| PHOX2B   |
| PIK3C3   |
| PIK3CA   |
| PIK3CD   |
| PIK3R1   |
| PIK3R2   |
| PKHD1    |
| PLAG1    |
| PLCB4    |
| PLK1     |
| PMAIP1   |
| PMS1     |
| PMS2     |
| PNKP     |
| POLD1    |
| POLD3    |
| POLE     |
| POLH     |
| POT1     |
| PPARD    |
| PPP2R1A  |
| PRDM1    |



|          |
|----------|
| PREX2    |
| PRF1     |
| PRKACA   |
| PRKAR1A  |
| PRKCB    |
| PRKCI    |
| PRKDC    |
| PRSS1    |
| PRSS3    |
| PTCH1    |
| PTEN     |
| PTK2     |
| PTPN11   |
| PTPN13   |
| QKI      |
| RAC1     |
| RAC3     |
| RAD50    |
| RAD51    |
| RAD51B   |
| RAD51C   |
| RAD51D   |
| RAD54L   |
| RAD9A    |
| RAF1     |
| RARA     |
| RARG     |
| RASGEF1A |
| RB1      |
| RCC1     |
| RECQL4   |
| RELA     |
| RELN     |
| RET      |
| RHOA     |
| RICTOR   |
| RNF43    |
| ROS1     |
| RPTOR    |
| RRM1     |
| RUNX1    |
| RUNX1T1  |
| SBDS     |

|          |
|----------|
| SDC4     |
| SDHA     |
| SDHB     |
| SDHC     |
| SDHD     |
| SERPINE1 |
| SETBP1   |
| SETD2    |
| SF3B1    |
| SGK1     |
| SKP2     |
| SLC34A2  |
| SLC3A2   |
| SMAD2    |
| SMAD3    |
| SMAD4    |
| SMAD7    |
| SMARCA4  |
| SMARCB1  |
| SMO      |
| SOCS1    |
| SOS1     |
| SOX2     |
| SPOP     |
| SPRED1   |
| SPRY4    |
| SRC      |
| SRSF2    |
| SRY      |
| STAG2    |
| STAT1    |
| STAT3    |
| STK11    |
| STMN1    |
| SUFU     |
| SUMO1    |
| TACC3    |
| TAP1     |
| TAP2     |
| TBK1     |
| TEK      |
| TEKT4    |
| TERC     |

|           |
|-----------|
| TERT      |
| TET2      |
| TFG       |
| TGFB1     |
| TGFBR2    |
| THADA     |
| TMEM127   |
| TMEM167A  |
| TMPRSS2   |
| TNF       |
| TNFAIP3   |
| TNFRSF11A |
| TNFRSF14  |
| TNFRSF19  |
| TNFRSF1B  |
| TNFSF11   |
| TOP1      |
| TOP2A     |
| TP53      |
| TP63      |
| TPMT      |
| TSC1      |
| TSC2      |
| TSHR      |
| TTF1      |
| TUBB3     |
| TYMS      |
| U2AF1     |
| UGT1A1    |
| UNG       |
| VAMP2     |
| VEGFA     |
| VHL       |
| WAS       |
| WRN       |
| WT1       |
| XPA       |
| XPC       |
| XRCC1     |
| XRCC2     |
| XRCC3     |
| XRCC4     |
| XRCC5     |

|        |
|--------|
| YAP1   |
| ZNF2   |
| ZNF217 |
| ZNF703 |
