# Supplementary material for: Genomic Correlates of Unfavorable Outcome in Locally Advanced Cervical Cancer Treated with Neoadjuvant Chemoradiation
Source: PubMed Central journal article supplement — Cancer Res Treat. 2022 Jan 17;54(4):1209–18. doi: 10.4143/crt.2021.963 (PMC9582489; doi:10.4143/crt.2021.963), 2022-01-17
Supplement: crt-2021-963_S3-Table.pdf [file crt-2021-963_S3-Table.pdf]

**S3 Table.** Sequencing statistics

| ID     | Q20 (%) | Q30 (%) | ON_TARGET_READS (%) | RATIO_OF_MAPPED (%) | MEAN_DEPTH | MEAN_DEPTH_DEDUP |
|--------|---------|---------|---------------------|---------------------|------------|------------------|
| CC_006 | 97.56   | 93.96   | 75.8                | 99.97               | 1,134.28   | 605.5            |
| CC_007 | 94.55   | 87.42   | 69.63               | 99.92               | 947.99     | 666.74           |
| CC_008 | 93.58   | 89.89   | 72.28               | 99.16               | 790.67     | 369.76           |
| CC_010 | 95.83   | 90.19   | 75.54               | 99.9                | 941.61     | 525.99           |
| CC_012 | 97.03   | 92.86   | 69.46               | 99.92               | 977.37     | 601.66           |
| CC_013 | 94.16   | 86.4    | 61.04               | 99.96               | 800.47     | 506.12           |
| CC_014 | 95.94   | 90.37   | 74.2                | 99.95               | 1816.29    | 685.59           |
| CC_015 | 94.56   | 88.68   | 66.35               | 99.76               | 869.65     | 452.27           |
| CC_018 | 95.92   | 90.49   | 73.54               | 99.87               | 644.96     | 309.15           |
| CC_019 | 91.42   | 82.05   | 68.21               | 99.82               | 1583.1     | 698.88           |
| CC_020 | 94.97   | 88.79   | 74.33               | 99.86               | 335.87     | 225.12           |
| CC_022 | 93.53   | 85.85   | 64.2                | 99.85               | 1107.73    | 657.47           |
| CC_023 | 93.72   | 85.98   | 61.27               | 99.89               | 1263.27    | 764.98           |
| CC_024 | 94.01   | 86.45   | 63.21               | 99.92               | 821.95     | 492.76           |
| CC_025 | 93.7    | 86.38   | 51.94               | 99.91               | 530.7      | 382.87           |
| CC_027 | 95.48   | 89.59   | 61.86               | 99.94               | 2159.25    | 1504.7           |
| CC_028 | 92.47   | 84.1    | 53.27               | 99.86               | 615.74     | 414.87           |
| CC_030 | 95.06   | 88.66   | 69.12               | 99.89               | 837.19     | 524.68           |
| CC_033 | 95.06   | 88.8    | 73.88               | 99.71               | 549.69     | 299.19           |
| CC_034 | 93.66   | 86.2    | 66.97               | 99.75               | 800.18     | 431.61           |
| CC_036 | 95.69   | 90.22   | 59.95               | 99.94               | 971.5      | 647.02           |
| CC_037 | 95.27   | 88.93   | 60.9                | 99.92               | 753.86     | 450.54           |
| CC_039 | 94.9    | 87.99   | 59.47               | 99.97               | 984.8      | 603.46           |
| CC_044 | 89.65   | 79.41   | 71.07               | 99.67               | 1067.73    | 302.51           |
| CC_045 | 94.66   | 87.57   | 64.61               | 99.97               | 1550.81    | 946.3            |

|        |       |       |       |       |          |          |
|--------|-------|-------|-------|-------|----------|----------|
| CC_047 | 94.14 | 86.63 | 59.11 | 99.96 | 1,090.95 | 709.69   |
| CC_048 | 98.53 | 96.23 | 78.16 | 99.78 | 1281     | 429.02   |
| CC_054 | 98.22 | 95.46 | 74.95 | 99.97 | 1,539.35 | 829.41   |
| CC_055 | 97.87 | 94.79 | 66.83 | 99.96 | 1,203.74 | 657.21   |
| CC_056 | 92.63 | 83.8  | 66.68 | 99.89 | 1,425.99 | 823.24   |
| CC_059 | 93.06 | 84.04 | 70.03 | 99.91 | 1230.8   | 525.53   |
| CC_060 | 87.7  | 74.73 | 64.41 | 99.66 | 801.01   | 375.9    |
| CC_061 | 92.31 | 82.98 | 65.97 | 99.77 | 627.48   | 380.41   |
| CC_064 | 96.97 | 92.78 | 75.01 | 99.96 | 454.09   | 239.52   |
| CC_066 | 91.97 | 81.75 | 72.33 | 99.9  | 1,630.65 | 831.13   |
| CC_067 | 97.69 | 94.39 | 63.11 | 99.98 | 1,670.98 | 928.95   |
| CC_069 | 93.22 | 84.89 | 73.21 | 99.88 | 673.48   | 316.9    |
| CC_070 | 93.89 | 85.86 | 73.58 | 99.86 | 742.37   | 380.64   |
| CC_071 | 93.98 | 86.05 | 74.38 | 99.9  | 732.25   | 324.55   |
| CC_072 | 98    | 95.11 | 74.37 | 99.95 | 931.44   | 479.4    |
| CC_076 | 92.81 | 83.87 | 64.13 | 99.91 | 2,057.22 | 1,098.98 |
| CC_077 | 97.69 | 94.33 | 63.33 | 99.98 | 1,199.25 | 708.75   |
| CC_079 | 91.98 | 82.65 | 63.76 | 99.86 | 956.88   | 549.04   |
| CC_081 | 94.1  | 87.17 | 77.41 | 99.77 | 794.3    | 355.99   |
| CC_083 | 91.17 | 81.98 | 62.21 | 99.4  | 322.81   | 190.95   |
| CC_084 | 95.89 | 90.66 | 70.24 | 99.95 | 367.13   | 207.22   |
| CC_085 | 97.99 | 94.97 | 68.77 | 99.97 | 2031.5   | 889.51   |
| CC_086 | 92.86 | 83.49 | 68.8  | 99.9  | 754.82   | 432.49   |
| CC_087 | 98.44 | 96.22 | 72.46 | 99.95 | 916.49   | 308.28   |
| CC_089 | 93.83 | 85.83 | 73.66 | 99.85 | 691.76   | 336.88   |
| CC_093 | 98.12 | 95.54 | 69.12 | 99.93 | 1,160.99 | 422.32   |
| CC_094 | 89.44 | 77.16 | 68.02 | 99.86 | 1,013.47 | 631.78   |
| CC_096 | 91.39 | 80.95 | 66.07 | 99.89 | 1,420.47 | 768.27   |

|        |       |       |       |       |          |          |
|--------|-------|-------|-------|-------|----------|----------|
| CC_100 | 91.38 | 81.19 | 67.65 | 99.78 | 1,113.35 | 626.71   |
| CC_101 | 93.36 | 84.96 | 70.85 | 99.84 | 1,091.45 | 486.56   |
| CC_102 | 92.1  | 83.34 | 72.45 | 99.58 | 1,255.65 | 600.55   |
| CC_104 | 92.71 | 83.24 | 73.54 | 99.9  | 1,487.76 | 715.24   |
| CC_106 | 98.34 | 96.16 | 77.52 | 99.76 | 442.59   | 193.19   |
| CC_107 | 97.27 | 93.53 | 60.62 | 99.97 | 1,104.47 | 528.72   |
| CC_110 | 97.91 | 94.9  | 66.97 | 99.94 | 872.94   | 480.9    |
| CC_111 | 98.17 | 95.48 | 76.51 | 99.96 | 1283.9   | 554.05   |
| CC_112 | 97.99 | 95.09 | 63.21 | 99.97 | 1639.17  | 1,015.91 |
