# Supplementary material for: Genomic Correlates of Unfavorable Outcome in Locally Advanced Cervical Cancer Treated with Neoadjuvant Chemoradiation
Source: PubMed Central journal article supplement — Cancer Res Treat. 2022 Jan 17;54(4):1209–18. doi: 10.4143/crt.2021.963 (PMC9582489; doi:10.4143/crt.2021.963), 2022-01-17
Supplement: crt-2021-963_S4-Table.pdf [file crt-2021-963_S4-Table.pdf]

**S4 Table.** *PIK3CA* alteration analysis

|                                      | Chinese(n=62) | Caucasian(n=82) |
|--------------------------------------|---------------|-----------------|
| <b><i>PIK3CA</i> alterations</b>     |               |                 |
| All                                  | 23(37%)       | 30(37%)         |
| Mutations                            | 19(31%)       | 21(26%)         |
| Amplification                        | 6(10%)        | 9(11%)          |
| <b><i>PIK3CA</i> mutant variants</b> |               |                 |
| E542K                                | 5(8%)         | 5(6%)           |
| E545K/Q                              | 5(8%)         | 9(11%)          |
| H1047R/L                             | 4(6%)         | 2(2%)           |
