# Supplementary material for: Genomic Correlates of Unfavorable Outcome in Locally Advanced Cervical Cancer Treated with Neoadjuvant Chemoradiation
Source: PubMed Central journal article supplement — Cancer Res Treat. 2022 Jan 17;54(4):1209–18. doi: 10.4143/crt.2021.963 (PMC9582489; doi:10.4143/crt.2021.963), 2022-01-17
Supplement: crt-2021-963_S5-Table.pdf [file crt-2021-963_S5-Table.pdf]

**S5 Table.** Variables associated with pathologic response to NACRT in locally advanced cervical cancer

| Characteristics                             | Univariate analysis |                | Multivariate analysis |                |
|---------------------------------------------|---------------------|----------------|-----------------------|----------------|
|                                             | OR (95% CI)         | <i>P</i> value | OR (95% CI)           | <i>P</i> value |
| Histology type, SCC vs ADC                  | 0.97 (0.17 ~5.12)   | 1.000          | -                     | -              |
| MSI status, MSI vs MSS                      | 0.64 (0.01 ~12.91)  | 1.000          | -                     | -              |
| Age, >44 vs ≤44 years                       | 2.09 (0.67 ~6.87)   | 0.200          | -                     | -              |
| Stage, IIA vs IB                            | 0.43 (0.13 ~1.33)   | 0.127          | -                     | -              |
| <i>ARID1A</i> , Mutants vs <i>wild-type</i> | 7.49 (0.77 ~375.18) | 0.077          | 1.26 (0.10 ~16.45)    | 0.858          |
| <i>CTCF</i> , Mutants vs <i>wild-type</i>   | 7.49 (0.77 ~375.18) | 0.077          | 5.84 (0.48 ~70.79)    | 0.166          |
| <i>PIK3CA</i> , Mutants vs <i>wild-type</i> | 3.05 (0.94 ~10.43)  | 0.062          | 2.45 (0.63 ~9.59)     | 0.198          |
| <i>KEAP1</i> , Mutants vs <i>wild-type</i>  | Inf(0.91 ~Inf)      | <b>0.031</b>   | -                     | 0.776          |
| TMB, TMB-H vs TMB-L                         | 4.67 (1.25 ~20.25)  | <b>0.011</b>   | 3.12 (0.70 ~13.94)    | 0.137          |
| <i>TP53</i> , SNP P72R vs <i>wild-type</i>  | 6.00 (1.50 ~30.00)  | <b>0.007</b>   | 6.17 (1.44 ~26.50)    | <b>0.014</b>   |
