# Supplementary material for: Genomic Correlates of Unfavorable Outcome in Locally Advanced Cervical Cancer Treated with Neoadjuvant Chemoradiation
Source: PubMed Central journal article supplement — Cancer Res Treat. 2022 Jan 17;54(4):1209–18. doi: 10.4143/crt.2021.963 (PMC9582489; doi:10.4143/crt.2021.963), 2022-01-17
Supplement: crt-2021-963_S7-Fig.pdf [file crt-2021-963_S7-Fig.pdf]

A

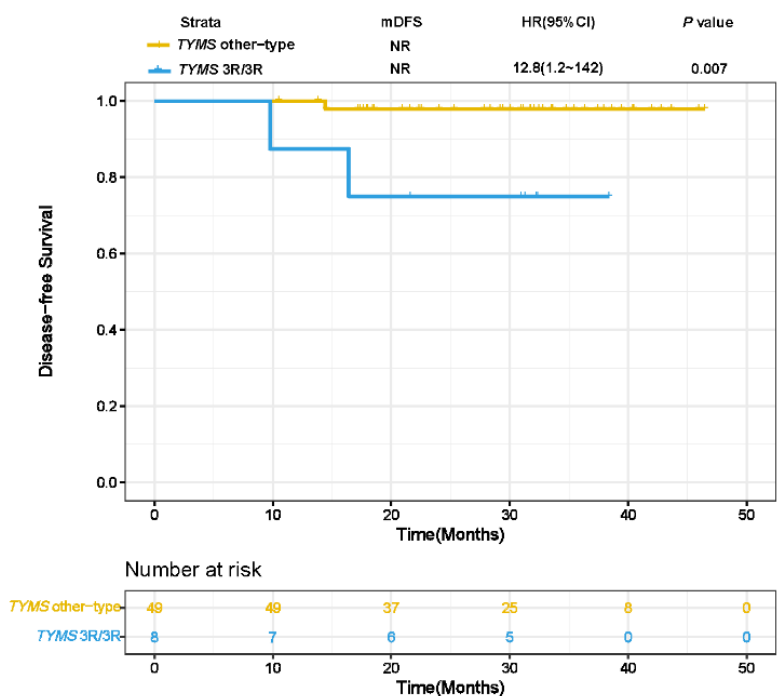

B

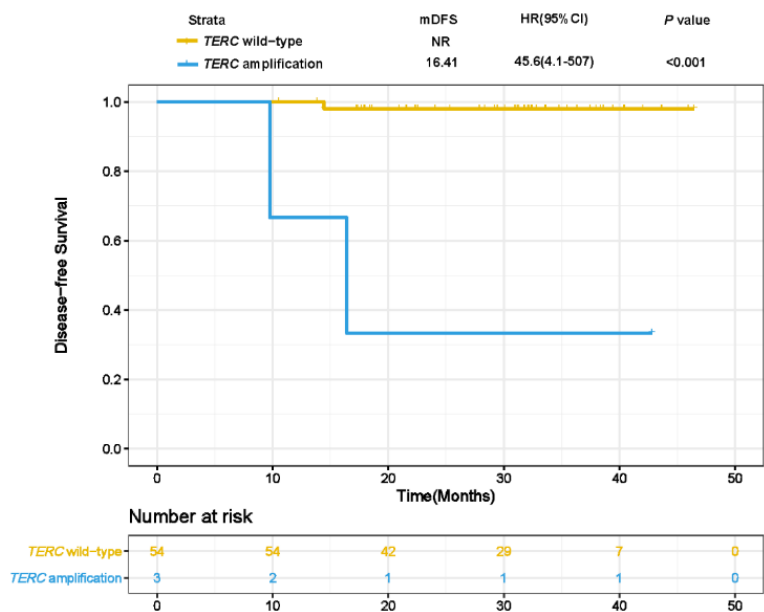

**S7 Fig.** Association of *TYMS* 3R/3R polymorphism and *TERC* amplification with higher cervical cancer recurrence risk
